# Supplementary material
Source: PubMed Central journal article supplement (PMC2991393)
Supplement: NIHMS227569-supplement-1_si_001.pdf [file NIHMS227569-supplement-1_si_001.pdf]

Table S1. Correlation between the number of G-C nearest neighbors and the thermodynamic contribution to duplex stability<sup>a</sup>

| <b>sm position<sup>b</sup></b>                               | <b>Number of G-C Nearest Neighbors</b> |       |      |
|--------------------------------------------------------------|----------------------------------------|-------|------|
|                                                              | 2                                      | 1     | 0    |
| <b>center</b>                                                |                                        |       |      |
| <b>average</b><br><b><math>\Delta G^\circ_{37,SM}</math></b> | 0.32                                   | 0.48  | 2.09 |
| <b>off-center<sup>c</sup></b>                                |                                        |       |      |
| <b>average</b><br><b><math>\Delta G^\circ_{37,SM}</math></b> | -0.05                                  | 0.28  | 1.09 |
| <b>5'-shifted</b>                                            |                                        |       |      |
| <b>average</b><br><b><math>\Delta G^\circ_{37,SM}</math></b> | 0.37                                   | -0.02 | 1.49 |
| <b>3'-shifted</b>                                            |                                        |       |      |
| <b>average</b><br><b><math>\Delta G^\circ_{37,SM}</math></b> | -0.05                                  | 0.59  | 0.70 |

<sup>a</sup> Averages are based on the data obtained from  $T_M^{-1}$  vs.  $\ln(C_T/4)$  plots for the nine complete sets. <sup>b</sup> The helical position of the single mismatch as described in Materials and Methods. <sup>c</sup> The off-center values are an average of the 5'- and 3'-shifted single mismatch data.
